# Supplementary material
Source: publisher site journal article supplement (https://www.dovepress.com/article/602958)
Supplement: Supplementary file 1 [file 602958%20Supplementary%20Tables.docx]

**Supplementary Table 1** Liver Function Parameters in Patients With and Without Hepatotoxicity

| **Hepatotoxicity** | **With Hepatotoxicity** | **Without Hepatotoxicity** |
| --- | --- | --- |
| Total bilirubin (μmol/L), median (IQR) | 16.70 (8.02-30.35) | 12.50 (8.30-18.92) |
| Alanine aminotransferase (U/L), median (IQR) | 47.10 (25.42-81.30) | 21.25 (13.70-37.10) |
| Aspartate aminotransferase (U/L), median (IQR) | 37.05 (27.32-61.18) | 22.35 (14.22-32.62) |
| Alkaline phosphatase (U/L), median (IQR) | 158.10 (79.88-215.85) | 92.1 (69.72-128.30) |

**Supplementary Table 2** Distribution of Patients by Grade of Hepatotoxicity

| **Hepatotoxicity** | **1stQ** | **2ndQ** | **3rdQ** | **4thQ** |
| --- | --- | --- | --- | --- |
| Cmin (mg/L)a | 0.41±0.13  (0.30-0.60) | 0.96±0.16  (0.61-1.20) | 1.56±0.19  (1.21-1.94) | 2.79±0.85  (1.95-5.20) |
| Grade 1, n (%) | 8 (11.8%) | 6 (8.5%) | 9 (15.5%) | 13 (20.0%) |
| Grade 2, n (%) | 3 (4.4%) | 1 (1.4%) | 3 (5.2%) | 8 (12.3%) |
| Grade 3, n (%) | 2 (2.9%) | 4 (5.6%) | 2 (3.4%) | 1 (1.5%) |
| Grade 4, n (%) | 0 (0%) | 0 (0%) | 0 (0%) | 0 (0%) |

**Notes:** aMean ± SD (range).
